# Supplementary material
Source: publisher site journal article supplement (https://www.dovepress.com/article/361981)
Supplement: Supplementary file 1 [file get_supplementary_file.php]

| Table 1: Patients information of the authors’ dataset | | | | | | | | | |
| --- | --- | --- | --- | --- | --- | --- | --- | --- | --- |
| Group | Name initials | Patient number | Age | Site of metastasis | Time of diagnosis | Gleason score | T | M | N |
| PBM-exo | WNG | AE******7 | 73 | L4 | May 2019 | 9 | 4 | 1 | 2 |
| ZPQ | AD******7 | 89 | L2,L3,L4,L5 | May 2020 | 10 | 4 | 1 | 1 |
| ZDE | AD******9 | 87 | T4，L2 | May 2020 | 10 | 4 | 1 | 1 |
| YCJ | AE******3 | 77 | L2,L3 | Aug 2020 | 9 | 4 | 1 | 1 |
| LSW | AE******9 | 81 | L2,L5 | Jun 2020 | 10 | 4 | 1 | X |
| CJC | AF******7 | 65 | L4 | Jul 2019 | 10 | 4 | 1 | 2 |
| ZYX | AD******9 | 92 | L2 | May 2019 | 10 | 4 | 1 | X |
| XGE | AE******4 | 79 | L3 | Aug 2020 | 10 | 3 | 1 | 1 |
| LSY | AD******5 | 84 | L2,L3 | Mar 2019 | 10 | 4 | 1 | X |
| SGX | AF******9 | 67 | T12 | Aug 2020 | 10 | 3 | 1 | 0 |
| Pca-exo | WJY | AG******7 | 58 | N.A. | Mar 2019 | 6 | 2 | 0 | 0 |
| CWZ | AE******4 | 80 | N.A. | May 2020 | 7 | 2 | 0 | 0 |
| ZK | AE******2 | 72 | N.A. | Jun 2019 | 8 | 3 | 0 | 1 |
| FYD | AF******8 | 65 | N.A. | Jun 2020 | 9 | 2 | 0 | 0 |
| QXR | AF******2 | 70 | N.A. | Jul 2020 | 9 | 3 | 0 | 0 |
| LRF | AG******4 | 59 | N.A. | Oct 2020 | 9 | 3 | 0 | 0 |
| YZP | AF******4 | 69 | N.A. | Oct 2020 | 7 | 2 | 0 | 0 |
| ZJW | AG******4 | 57 | N.A. | Dec 2020 | 7 | 2 | 0 | 0 |
| ZYF | AG******2 | 58 | N.A. | Aug 2020 | 8 | 2 | 0 | 0 |
| XST | AF******6 | 66 | N.A. | Nov 2020 | 7 | 2 | 0 | 0 |
| N.A.: Not available; L: Lumbar spine, T: Thoracic spine; X: Unclear | | | | | | | | | |

**Table 2: Primer and sequence list of miRNAs:**

| Primer name | | Genetic information | Primer sequence (5`--3`) |
| --- | --- | --- | --- |
| U6 | RT | NR_004394.1 | AACGCTTCACGAATTTGCGT |
| Forward | CTCGCTTCGGCAGCACAT |
| Reverse | AACGCTTCACGAATTTGCGT |
| hsa-miR-125a-3p | RT | MIMAT0004602 | CTCAACTGGTGTCGTGGAGTCGGCAATTCAGTTGAGGGCTCCCA |
| Forward | GGACAGGTGAGGTTCTTGGG |
| Reverse | CTCAACTGGTGTCGTGGAGTC |
| hsa-miR-330-3p | RT | MIMAT0000751 | CTCAACTGGTGTCGTGGAGTCGGCAATTCAGTTGAGTCTCTGCA |
| Forward | GCAAAGCACACGGCCTG |
| Reverse | CTCAACTGGTGTCGTGGAGTC |
| hsa-miR-339-5p | RT | MIMAT0000764 | CTCAACTGGTGTCGTGGAGTCGGCAATTCAGTTGAGCGTGAGCT |
| Forward | TCCCTGTCCTCCAGGAGC |
| Reverse | CTCAACTGGTGTCGTGGAGTC |
| hsa-miR-613 | RT | MIMAT0003300 | CTCAACTGGTGTCGTGGAGTCGGCAATTCAGTTGAGGCTGAGGT |
| Forward | GACCTCAGCCTCAACTGAATTG |
| Reverse | CTCAACTGGTGTCGTGGAGTC |

**Table 3: List of differential miRNAs of PBM-exo:**

| ID | logFC | logCPM | PValue | FDR | stat |
| --- | --- | --- | --- | --- | --- |
| hsa-miR-516a-3p | -4.736 | 7.197698 | 6.12E-29 | 1.57E-25 | down-regulated |
| hsa-miR-3136-3p | -4.43561 | 10.78572 | 6.38E-23 | 5.47E-20 | down-regulated |
| hsa-miR-760 | -4.2142 | 9.73702 | 9.92E-15 | 2.12E-12 | down-regulated |
| hsa-miR-4731-5p | -3.92222 | 6.199576 | 2.28E-24 | 2.93E-21 | down-regulated |
| hsa-miR-4723-3p | -3.64291 | 9.604643 | 0.000644 | 0.004461 | down-regulated |
| hsa-miR-1911-3p | -3.14039 | 5.440702 | 2.07E-18 | 8.88E-16 | down-regulated |
| hsa-miR-448 | -2.7143 | 5.876237 | 3.18E-18 | 1.17E-15 | down-regulated |
| hsa-miR-518a-3p | -2.67563 | 4.593691 | 1.26E-22 | 8.08E-20 | down-regulated |
| hsa-miR-7159-3p | -2.64061 | 6.233793 | 1.36E-08 | 6.47E-07 | down-regulated |
| hsa-miR-105-3p | -2.62895 | 4.942878 | 5.40E-19 | 2.77E-16 | down-regulated |
| hsa-miR-517-5p | -2.38653 | 6.530777 | 3.83E-06 | 8.27E-05 | down-regulated |
| hsa-miR-3168 | -2.18681 | 4.023714 | 7.84E-08 | 2.96E-06 | down-regulated |
| hsa-miR-363-5p | -2.17223 | 6.087554 | 2.09E-09 | 1.28E-07 | down-regulated |
| hsa-miR-3173-3p | -2.16934 | 5.997898 | 9.32E-05 | 0.000989 | down-regulated |
| hsa-miR-4641 | -2.12528 | 5.596936 | 3.01E-14 | 5.96E-12 | down-regulated |
| hsa-miR-147a | -2.11257 | 5.169385 | 4.98E-17 | 1.60E-14 | down-regulated |
| hsa-miR-6783-3p | -2.08201 | 6.426661 | 3.66E-12 | 4.71E-10 | down-regulated |
| hsa-miR-4419a | -2.07793 | 4.555792 | 1.08E-09 | 6.76E-08 | down-regulated |
| hsa-miR-3159 | -1.96324 | 5.703545 | 9.93E-17 | 2.55E-14 | down-regulated |
| hsa-miR-4267 | -1.94262 | 4.071346 | 9.63E-12 | 9.90E-10 | down-regulated |
| hsa-miR-141-5p | -1.89355 | 5.569936 | 2.68E-08 | 1.17E-06 | down-regulated |
| hsa-miR-4766-3p | -1.89159 | 7.166006 | 0.011848 | 0.046399 | down-regulated |
| hsa-miR-4703-3p | -1.86848 | 3.897788 | 1.06E-10 | 7.97E-09 | down-regulated |
| hsa-miR-215-3p | -1.8601 | 6.32162 | 1.26E-11 | 1.24E-09 | down-regulated |
| hsa-miR-4327 | -1.77657 | 4.41429 | 1.31E-10 | 9.60E-09 | down-regulated |
| hsa-miR-4314 | -1.76582 | 2.861088 | 3.69E-09 | 2.21E-07 | down-regulated |
| hsa-miR-4692 | -1.74601 | 7.539484 | 1.54E-10 | 1.10E-08 | down-regulated |
| hsa-miR-1268a | -1.74292 | 4.61454 | 2.49E-16 | 5.82E-14 | down-regulated |
| hsa-miR-516b-3p | -1.7375 | 2.072509 | 1.31E-05 | 0.000222 | down-regulated |
| hsa-miR-3127-5p | -1.7254 | 5.749562 | 6.57E-17 | 1.87E-14 | down-regulated |
| hsa-miR-4514 | -1.71346 | 4.508884 | 3.58E-11 | 3.07E-09 | down-regulated |
| hsa-miR-5580-5p | -1.70491 | 3.205435 | 1.14E-07 | 4.13E-06 | down-regulated |
| hsa-miR-3145-3p | -1.70116 | 6.050272 | 1.03E-12 | 1.65E-10 | down-regulated |
| hsa-miR-548m | -1.6665 | 4.626588 | 8.73E-07 | 2.38E-05 | down-regulated |
| hsa-miR-6128 | -1.60939 | 3.01749 | 6.29E-11 | 4.90E-09 | down-regulated |
| hsa-miR-5683 | -1.60785 | 5.848484 | 1.96E-05 | 0.00031 | down-regulated |
| hsa-miR-3942-3p | -1.60254 | 5.451013 | 1.64E-13 | 3.01E-11 | down-regulated |
| hsa-miR-125a-3p | -1.58921 | 5.936985 | 1.22E-12 | 1.74E-10 | down-regulated |
| hsa-miR-3607-3p | -1.58746 | 3.898729 | 3.26E-11 | 2.97E-09 | down-regulated |
| hsa-miR-4773 | -1.5859 | 4.53594 | 6.22E-12 | 7.61E-10 | down-regulated |
| hsa-miR-24-2-5p | -1.57876 | 6.640295 | 9.83E-09 | 4.95E-07 | down-regulated |
| hsa-miR-4259 | -1.53605 | 6.197572 | 3.35E-11 | 2.97E-09 | down-regulated |
| hsa-miR-650 | -1.53277 | 4.406726 | 0.001389 | 0.008268 | down-regulated |
| hsa-miR-329-5p | -1.51708 | 5.31895 | 3.86E-10 | 2.61E-08 | down-regulated |
| hsa-miR-5589-3p | -1.48072 | 4.564079 | 1.47E-06 | 3.60E-05 | down-regulated |
| hsa-miR-603 | -1.47973 | 6.644082 | 1.12E-12 | 1.69E-10 | down-regulated |
| hsa-miR-4489 | -1.46463 | 5.808758 | 5.28E-13 | 9.04E-11 | down-regulated |
| hsa-miR-676-5p | -1.39975 | 6.917018 | 7.05E-12 | 8.23E-10 | down-regulated |
| hsa-miR-8070 | -1.38276 | 6.131474 | 7.77E-09 | 4.16E-07 | down-regulated |
| hsa-miR-5579-5p | -1.38018 | 4.289739 | 3.71E-08 | 1.54E-06 | down-regulated |
| hsa-miR-3614-5p | -1.36708 | 5.315031 | 2.34E-11 | 2.23E-09 | down-regulated |
| hsa-miR-7641 | -1.3588 | 5.406371 | 1.86E-08 | 8.71E-07 | down-regulated |
| hsa-miR-4519 | -1.33416 | 4.049872 | 5.17E-08 | 1.98E-06 | down-regulated |
| hsa-miR-2278 | -1.33365 | 4.856434 | 5.24E-09 | 2.99E-07 | down-regulated |
| hsa-miR-3939 | -1.3208 | 7.07046 | 4.96E-10 | 3.27E-08 | down-regulated |
| hsa-miR-520f-3p | -1.31573 | 4.258504 | 1.70E-06 | 4.05E-05 | down-regulated |
| hsa-miR-4517 | -1.3128 | 7.006701 | 1.58E-10 | 1.10E-08 | down-regulated |
| hsa-miR-384 | -1.31205 | 3.410809 | 4.14E-07 | 1.27E-05 | down-regulated |
| hsa-miR-4768-5p | -1.30532 | 5.474284 | 1.09E-08 | 5.37E-07 | down-regulated |
| hsa-miR-378h | -1.30131 | 6.706402 | 0.006364 | 0.028584 | down-regulated |
| hsa-miR-4640-3p | -1.28269 | 4.809661 | 4.19E-11 | 3.47E-09 | down-regulated |
| hsa-miR-3170 | -1.28079 | 5.568047 | 1.81E-12 | 2.45E-10 | down-regulated |
| hsa-miR-3591-3p | -1.27966 | 4.425425 | 0.000353 | 0.002764 | down-regulated |
| hsa-miR-365b-3p | -1.27663 | 3.136656 | 0.000202 | 0.001787 | down-regulated |
| hsa-miR-4633-3p | -1.26671 | 5.952966 | 0.004675 | 0.022283 | down-regulated |
| hsa-miR-6846-5p | -1.2662 | 6.074915 | 4.46E-08 | 1.74E-06 | down-regulated |
| hsa-miR-218-5p | -1.26404 | 6.583442 | 5.80E-06 | 0.000119 | down-regulated |
| hsa-miR-34c-3p | -1.25761 | 4.94623 | 8.27E-07 | 2.28E-05 | down-regulated |
| hsa-miR-7855-5p | -1.25341 | 6.25639 | 0.000439 | 0.003197 | down-regulated |
| hsa-miR-642a-5p | -1.25163 | 3.15205 | 4.48E-08 | 1.74E-06 | down-regulated |
| hsa-miR-192-3p | -1.25116 | 3.677735 | 3.04E-07 | 9.65E-06 | down-regulated |
| hsa-miR-34b-5p | -1.24625 | 4.588353 | 9.45E-09 | 4.86E-07 | down-regulated |
| hsa-miR-3974 | -1.22056 | 5.718744 | 9.13E-12 | 9.77E-10 | down-regulated |
| hsa-miR-3671 | -1.21165 | 4.251998 | 4.80E-11 | 3.85E-09 | down-regulated |
| hsa-miR-3197 | -1.21002 | 6.541505 | 2.35E-08 | 1.04E-06 | down-regulated |
| hsa-miR-3927-3p | -1.20521 | 5.154479 | 2.75E-07 | 8.95E-06 | down-regulated |
| hsa-miR-1255b-2-3p | -1.20286 | 5.76436 | 6.02E-07 | 1.72E-05 | down-regulated |
| hsa-miR-122-5p | -1.19628 | 12.29507 | 0.039006 | 0.117276 | down-regulated |
| hsa-miR-3133 | -1.18433 | 4.705102 | 1.28E-08 | 6.20E-07 | down-regulated |
| hsa-miR-3591-5p | -1.18385 | 4.715305 | 0.000313 | 0.002508 | down-regulated |
| hsa-miR-6508-5p | -1.16695 | 6.951181 | 0.000294 | 0.00239 | down-regulated |
| hsa-miR-3908 | -1.16503 | 5.432608 | 3.19E-08 | 1.34E-06 | down-regulated |
| hsa-miR-675-5p | -1.16249 | 5.499578 | 7.78E-10 | 5.00E-08 | down-regulated |
| hsa-miR-567 | -1.14176 | 4.950264 | 0.001472 | 0.008653 | down-regulated |
| hsa-miR-4720-5p | -1.13547 | 2.563379 | 0.000484 | 0.003495 | down-regulated |
| hsa-miR-520d-3p | -1.11246 | 2.88928 | 6.29E-06 | 0.000125 | down-regulated |
| hsa-miR-5571-5p | -1.11123 | 3.51941 | 0.000519 | 0.003671 | down-regulated |
| hsa-miR-609 | -1.11047 | 5.169234 | 0.01956 | 0.069167 | down-regulated |
| hsa-miR-1291 | -1.10895 | 5.299694 | 8.09E-12 | 9.03E-10 | down-regulated |
| hsa-miR-548y | -1.09391 | 6.377882 | 1.08E-07 | 3.97E-06 | down-regulated |
| hsa-miR-3672 | -1.09187 | 4.374827 | 2.25E-08 | 1.03E-06 | down-regulated |
| hsa-miR-6844 | -1.07779 | 4.987803 | 3.92E-09 | 2.29E-07 | down-regulated |
| hsa-miR-4789-5p | -1.07587 | 2.882845 | 2.79E-05 | 0.000396 | down-regulated |
| hsa-miR-7157-3p | -1.07225 | 5.554738 | 7.34E-07 | 2.05E-05 | down-regulated |
| hsa-miR-2053 | -1.07079 | 2.496327 | 0.000686 | 0.00471 | down-regulated |
| hsa-miR-200c-5p | -1.07062 | 4.3028 | 2.52E-07 | 8.40E-06 | down-regulated |
| hsa-miR-5002-3p | -1.06864 | 4.791086 | 1.47E-07 | 5.24E-06 | down-regulated |
| hsa-miR-1301-5p | -1.06318 | 5.194707 | 7.53E-09 | 4.12E-07 | down-regulated |
| hsa-miR-218-2-3p | -1.05617 | 5.213512 | 4.14E-08 | 1.69E-06 | down-regulated |
| hsa-miR-195-3p | -1.04852 | 5.493453 | 3.97E-05 | 0.000506 | down-regulated |
| hsa-miR-6506-3p | -1.04375 | 5.485659 | 1.14E-06 | 2.96E-05 | down-regulated |
| hsa-miR-4509 | -1.03752 | 5.026927 | 2.30E-08 | 1.04E-06 | down-regulated |
| hsa-miR-4475 | -1.03715 | 3.33165 | 9.03E-07 | 2.44E-05 | down-regulated |
| hsa-miR-1262 | -1.03592 | 5.057732 | 1.20E-06 | 3.09E-05 | down-regulated |
| hsa-miR-217 | -1.01857 | 6.583566 | 9.55E-07 | 2.56E-05 | down-regulated |
| hsa-miR-4788 | -1.01596 | 3.958014 | 5.60E-07 | 1.63E-05 | down-regulated |
| hsa-miR-1264 | -1.00734 | 6.357853 | 1.70E-06 | 4.05E-05 | down-regulated |
| hsa-miR-5696 | -1.00167 | 6.375784 | 0.00038 | 0.002897 | down-regulated |
| hsa-miR-589-5p | 1.006064 | 7.103445 | 0.001534 | 0.008933 | up-regulated |
| hsa-miR-424-3p | 1.01007 | 6.622643 | 0.001021 | 0.006457 | up-regulated |
| hsa-miR-132-3p | 1.013919 | 7.00853 | 0.000215 | 0.001869 | up-regulated |
| hsa-miR-424-5p | 1.016519 | 8.954192 | 0.004961 | 0.023214 | up-regulated |
| hsa-miR-7976 | 1.018944 | 6.099777 | 4.26E-05 | 0.000525 | up-regulated |
| hsa-miR-3940-3p | 1.019478 | 6.837293 | 0.030818 | 0.098107 | up-regulated |
| hsa-miR-15b-3p | 1.021412 | 9.353496 | 0.000961 | 0.006154 | up-regulated |
| hsa-let-7f-1-3p | 1.034481 | 5.478162 | 2.92E-05 | 0.000404 | up-regulated |
| hsa-miR-548ah-3p | 1.036496 | 3.372532 | 0.004709 | 0.022402 | up-regulated |
| hsa-miR-99b-5p | 1.041394 | 9.289177 | 0.001628 | 0.009293 | up-regulated |
| hsa-miR-941 | 1.046734 | 5.810463 | 0.000214 | 0.001869 | up-regulated |
| hsa-miR-20b-5p | 1.04694 | 8.949268 | 0.000373 | 0.002878 | up-regulated |
| hsa-miR-548ar-3p | 1.051837 | 3.309591 | 0.001186 | 0.007237 | up-regulated |
| hsa-miR-628-3p | 1.053968 | 6.446002 | 0.00082 | 0.005458 | up-regulated |
| hsa-miR-221-5p | 1.060928 | 7.186128 | 0.000995 | 0.006328 | up-regulated |
| hsa-miR-29a-3p | 1.064842 | 11.58584 | 0.003858 | 0.019321 | up-regulated |
| hsa-miR-106b-3p | 1.070327 | 9.833172 | 0.000612 | 0.004252 | up-regulated |
| hsa-miR-503-5p | 1.072045 | 7.558781 | 0.002751 | 0.014425 | up-regulated |
| hsa-miR-940 | 1.078208 | 4.458275 | 0.000172 | 0.00158 | up-regulated |
| hsa-let-7e-3p | 1.090894 | 4.512291 | 0.000283 | 0.002312 | up-regulated |
| hsa-miR-4755-5p | 1.096496 | 5.815969 | 0.007306 | 0.031913 | up-regulated |
| hsa-miR-548d-5p | 1.09878 | 7.254004 | 0.00029 | 0.002362 | up-regulated |
| hsa-miR-548aq-3p | 1.105527 | 3.70357 | 0.023733 | 0.080435 | up-regulated |
| hsa-miR-301a-3p | 1.106976 | 6.756715 | 0.000185 | 0.001671 | up-regulated |
| hsa-miR-4258 | 1.108037 | 5.19159 | 0.003912 | 0.019551 | up-regulated |
| hsa-miR-17-3p | 1.112563 | 6.928374 | 0.000389 | 0.002942 | up-regulated |
| hsa-miR-612 | 1.113602 | 6.794287 | 8.84E-05 | 0.000946 | up-regulated |
| hsa-miR-15b-5p | 1.118101 | 12.0506 | 8.78E-05 | 0.000944 | up-regulated |
| hsa-miR-425-5p | 1.119019 | 10.8803 | 0.000742 | 0.005017 | up-regulated |
| hsa-miR-505-5p | 1.123206 | 5.506983 | 0.000166 | 0.001545 | up-regulated |
| hsa-miR-583 | 1.130491 | 6.431156 | 0.000413 | 0.003064 | up-regulated |
| hsa-miR-199b-5p | 1.143359 | 6.534551 | 0.000883 | 0.005768 | up-regulated |
| hsa-miR-543 | 1.147217 | 7.018888 | 0.000394 | 0.002957 | up-regulated |
| hsa-miR-542-3p | 1.159997 | 6.296774 | 0.004653 | 0.022218 | up-regulated |
| hsa-miR-142-5p | 1.162631 | 11.18599 | 0.000883 | 0.005768 | up-regulated |
| hsa-miR-23b-3p | 1.167181 | 9.420334 | 0.000167 | 0.001545 | up-regulated |
| hsa-miR-19b-3p | 1.167926 | 12.39702 | 0.004029 | 0.020022 | up-regulated |
| hsa-miR-339-3p | 1.176434 | 8.130137 | 0.000963 | 0.006154 | up-regulated |
| hsa-miR-7977 | 1.18004 | 6.111242 | 0.000509 | 0.003622 | up-regulated |
| hsa-miR-145-5p | 1.182563 | 7.122294 | 0.001023 | 0.006457 | up-regulated |
| hsa-miR-200a-3p | 1.18595 | 7.470261 | 0.03064 | 0.097903 | up-regulated |
| hsa-let-7a-5p | 1.187585 | 13.34484 | 2.25E-05 | 0.000342 | up-regulated |
| hsa-miR-22-5p | 1.18939 | 9.525833 | 0.000589 | 0.004124 | up-regulated |
| hsa-miR-130b-5p | 1.190848 | 7.406992 | 0.001556 | 0.009016 | up-regulated |
| hsa-miR-328-3p | 1.195153 | 8.857849 | 0.000397 | 0.002974 | up-regulated |
| hsa-miR-331-5p | 1.202408 | 5.651559 | 1.09E-05 | 0.000191 | up-regulated |
| hsa-miR-6073 | 1.207349 | 5.701965 | 5.73E-06 | 0.000119 | up-regulated |
| hsa-miR-99a-5p | 1.208934 | 10.2191 | 0.015956 | 0.058694 | up-regulated |
| hsa-miR-452-5p | 1.210525 | 7.023267 | 0.001512 | 0.008845 | up-regulated |
| hsa-miR-139-5p | 1.213748 | 9.2659 | 0.000143 | 0.001359 | up-regulated |
| hsa-miR-505-3p | 1.213795 | 7.508162 | 0.000753 | 0.005063 | up-regulated |
| hsa-miR-5582-3p | 1.214296 | 3.381494 | 0.013333 | 0.051047 | up-regulated |
| hsa-miR-450a-5p | 1.215004 | 7.532298 | 0.003071 | 0.015835 | up-regulated |
| hsa-miR-421 | 1.226837 | 8.202562 | 0.000243 | 0.002074 | up-regulated |
| hsa-let-7b-3p | 1.237825 | 6.583535 | 0.000282 | 0.002312 | up-regulated |
| hsa-miR-338-5p | 1.237882 | 6.438787 | 5.46E-05 | 0.00064 | up-regulated |
| hsa-miR-141-3p | 1.238254 | 13.07128 | 0.000366 | 0.002846 | up-regulated |
| hsa-miR-598-3p | 1.239644 | 7.869155 | 0.0021 | 0.011505 | up-regulated |
| hsa-miR-7843-3p | 1.240813 | 6.732107 | 0.000372 | 0.002878 | up-regulated |
| hsa-miR-101-3p | 1.243054 | 13.42863 | 0.00056 | 0.003939 | up-regulated |
| hsa-miR-106a-5p | 1.243115 | 8.316646 | 0.000335 | 0.002654 | up-regulated |
| hsa-miR-181a-5p | 1.244293 | 11.65805 | 0.000938 | 0.006024 | up-regulated |
| hsa-miR-574-3p | 1.247976 | 8.714481 | 0.000314 | 0.002508 | up-regulated |
| hsa-miR-1271-5p | 1.257261 | 6.160145 | 0.000255 | 0.002138 | up-regulated |
| hsa-miR-4540 | 1.259221 | 6.648783 | 5.92E-07 | 1.71E-05 | up-regulated |
| hsa-miR-6718-5p | 1.262595 | 7.561313 | 0.005746 | 0.026404 | up-regulated |
| hsa-miR-92b-3p | 1.270907 | 8.510181 | 0.000369 | 0.002867 | up-regulated |
| hsa-miR-3679-5p | 1.278238 | 8.614336 | 0.000188 | 0.001692 | up-regulated |
| hsa-miR-140-3p | 1.281771 | 12.10294 | 0.00015 | 0.001403 | up-regulated |
| hsa-miR-27b-5p | 1.287033 | 7.048824 | 9.87E-05 | 0.001018 | up-regulated |
| hsa-let-7a-3p | 1.295425 | 8.59245 | 0.000486 | 0.0035 | up-regulated |
| hsa-miR-330-3p | 1.296755 | 8.174677 | 0.000282 | 0.002312 | up-regulated |
| hsa-miR-2355-3p | 1.302227 | 7.542742 | 0.000112 | 0.001115 | up-regulated |
| hsa-let-7d-5p | 1.319743 | 11.73581 | 3.88E-05 | 0.000498 | up-regulated |
| hsa-miR-19a-3p | 1.320019 | 10.84791 | 0.001139 | 0.007004 | up-regulated |
| hsa-miR-625-5p | 1.320558 | 6.053948 | 2.54E-05 | 0.000373 | up-regulated |
| hsa-miR-7705 | 1.324488 | 6.791186 | 0.007523 | 0.032425 | up-regulated |
| hsa-miR-4432 | 1.328465 | 5.245105 | 0.000753 | 0.005063 | up-regulated |
| hsa-miR-1301-3p | 1.339838 | 8.362675 | 9.40E-05 | 0.000993 | up-regulated |
| hsa-miR-629-5p | 1.354337 | 8.445378 | 3.39E-05 | 0.000451 | up-regulated |
| hsa-miR-345-5p | 1.364904 | 8.05909 | 0.000103 | 0.001057 | up-regulated |
| hsa-miR-130a-3p | 1.372606 | 9.028856 | 0.000348 | 0.002741 | up-regulated |
| hsa-miR-374b-3p | 1.373073 | 5.588913 | 7.75E-06 | 0.000148 | up-regulated |
| hsa-miR-1-3p | 1.375526 | 9.403618 | 0.005541 | 0.025558 | up-regulated |
| hsa-miR-2355-5p | 1.382034 | 6.752892 | 0.000281 | 0.002312 | up-regulated |
| hsa-miR-181b-5p | 1.383115 | 8.346972 | 6.75E-05 | 0.000761 | up-regulated |
| hsa-miR-423-5p | 1.398012 | 13.69951 | 0.000115 | 0.001133 | up-regulated |
| hsa-let-7g-5p | 1.410873 | 13.87669 | 1.76E-05 | 0.000284 | up-regulated |
| hsa-let-7f-2-3p | 1.412126 | 7.209687 | 0.00012 | 0.00117 | up-regulated |
| hsa-miR-548e-3p | 1.412688 | 6.296479 | 5.20E-05 | 0.000618 | up-regulated |
| hsa-miR-429 | 1.416629 | 5.911023 | 0.002772 | 0.014501 | up-regulated |
| hsa-miR-186-5p | 1.418839 | 12.11198 | 0.000374 | 0.002879 | up-regulated |
| hsa-miR-6852-5p | 1.422784 | 5.943851 | 7.09E-05 | 0.000789 | up-regulated |
| hsa-miR-181d-5p | 1.423363 | 6.947193 | 3.50E-05 | 0.000459 | up-regulated |
| hsa-let-7f-5p | 1.425676 | 13.36373 | 1.16E-05 | 0.000201 | up-regulated |
| hsa-miR-195-5p | 1.428349 | 5.663032 | 1.50E-05 | 0.000249 | up-regulated |
| hsa-miR-30d-5p | 1.441457 | 13.52501 | 0.000198 | 0.001755 | up-regulated |
| hsa-miR-1296-5p | 1.450008 | 6.052869 | 2.67E-05 | 0.00039 | up-regulated |
| hsa-miR-590-3p | 1.461651 | 6.438323 | 0.000271 | 0.00225 | up-regulated |
| hsa-miR-766-3p | 1.46694 | 6.443862 | 2.83E-05 | 0.000399 | up-regulated |
| hsa-miR-130b-3p | 1.467544 | 7.65545 | 2.52E-05 | 0.000373 | up-regulated |
| hsa-let-7d-3p | 1.47337 | 10.5046 | 9.99E-05 | 0.001027 | up-regulated |
| hsa-miR-6763-3p | 1.478573 | 8.217818 | 0.000304 | 0.002456 | up-regulated |
| hsa-miR-590-5p | 1.484672 | 4.420804 | 2.76E-05 | 0.000396 | up-regulated |
| hsa-miR-29a-5p | 1.486353 | 8.243444 | 0.000107 | 0.001084 | up-regulated |
| hsa-miR-769-5p | 1.489332 | 7.488291 | 0.000233 | 0.001994 | up-regulated |
| hsa-miR-374a-3p | 1.489967 | 6.813529 | 6.78E-06 | 0.000132 | up-regulated |
| hsa-miR-16-1-3p | 1.491484 | 6.401816 | 7.03E-06 | 0.000136 | up-regulated |
| hsa-let-7i-5p | 1.494669 | 13.90313 | 1.10E-05 | 0.000193 | up-regulated |
| hsa-miR-128-3p | 1.499635 | 10.8404 | 0.000108 | 0.001086 | up-regulated |
| hsa-miR-181c-5p | 1.513304 | 7.324926 | 6.08E-05 | 0.000697 | up-regulated |
| hsa-miR-126-5p | 1.514124 | 13.87955 | 0.000377 | 0.002888 | up-regulated |
| hsa-miR-4659b-5p | 1.51565 | 1.878845 | 0.000435 | 0.003197 | up-regulated |
| hsa-miR-103a-3p | 1.521951 | 14.32065 | 2.12E-05 | 0.000328 | up-regulated |
| hsa-miR-30e-5p | 1.524497 | 14.10737 | 0.000113 | 0.001115 | up-regulated |
| hsa-miR-20a-3p | 1.549486 | 8.181613 | 0.000126 | 0.001225 | up-regulated |
| hsa-miR-185-5p | 1.554475 | 13.75871 | 3.06E-05 | 0.000421 | up-regulated |
| hsa-miR-548j-5p | 1.561488 | 4.915447 | 2.72E-05 | 0.000392 | up-regulated |
| hsa-miR-151b | 1.566166 | 1.218098 | 0.001579 | 0.009113 | up-regulated |
| hsa-miR-191-5p | 1.576305 | 14.22273 | 0.000111 | 0.00111 | up-regulated |
| hsa-miR-148a-3p | 1.576402 | 13.26549 | 0.000691 | 0.004723 | up-regulated |
| hsa-miR-340-5p | 1.579409 | 11.16681 | 0.000232 | 0.001994 | up-regulated |
| hsa-miR-484 | 1.600162 | 12.06705 | 3.64E-05 | 0.000472 | up-regulated |
| hsa-miR-548j-3p | 1.600643 | 4.474748 | 0.00023 | 0.001979 | up-regulated |
| hsa-miR-18a-5p | 1.606277 | 8.070594 | 3.48E-06 | 7.64E-05 | up-regulated |
| hsa-miR-152-3p | 1.612685 | 10.03961 | 0.000347 | 0.00274 | up-regulated |
| hsa-miR-3605-5p | 1.622419 | 5.936864 | 0.001911 | 0.010625 | up-regulated |
| hsa-miR-361-5p | 1.628776 | 10.15788 | 0.000206 | 0.00181 | up-regulated |
| hsa-miR-30b-5p | 1.629603 | 10.81627 | 2.91E-05 | 0.000404 | up-regulated |
| hsa-miR-148b-3p | 1.636739 | 12.98865 | 6.38E-05 | 0.000725 | up-regulated |
| hsa-miR-4433a-5p | 1.648354 | 6.175048 | 8.41E-05 | 0.000924 | up-regulated |
| hsa-miR-26b-5p | 1.648981 | 13.61022 | 5.15E-06 | 0.000108 | up-regulated |
| hsa-miR-143-3p | 1.655218 | 11.10212 | 7.88E-05 | 0.000869 | up-regulated |
| hsa-miR-4286 | 1.660918 | 6.741614 | 0.000502 | 0.003586 | up-regulated |
| hsa-miR-335-5p | 1.662238 | 11.17296 | 3.16E-05 | 0.000431 | up-regulated |
| hsa-miR-652-3p | 1.663161 | 9.792886 | 4.08E-05 | 0.000512 | up-regulated |
| hsa-miR-146a-5p | 1.666517 | 14.56012 | 0.000792 | 0.005286 | up-regulated |
| hsa-miR-27b-3p | 1.669355 | 13.34923 | 0.000141 | 0.001343 | up-regulated |
| hsa-miR-98-5p | 1.671207 | 9.477862 | 3.12E-06 | 6.98E-05 | up-regulated |
| hsa-miR-33a-5p | 1.676834 | 7.125062 | 3.46E-05 | 0.000456 | up-regulated |
| hsa-miR-30e-3p | 1.677789 | 9.325374 | 4.27E-05 | 0.000525 | up-regulated |
| hsa-miR-27a-3p | 1.681538 | 12.67067 | 4.12E-05 | 0.000513 | up-regulated |
| hsa-miR-374b-5p | 1.690948 | 8.907024 | 1.68E-05 | 0.000273 | up-regulated |
| hsa-miR-4453 | 1.693782 | 7.142016 | 8.24E-08 | 3.07E-06 | up-regulated |
| hsa-miR-3692-5p | 1.706103 | 9.172755 | 0.000172 | 0.00158 | up-regulated |
| hsa-miR-374a-5p | 1.71196 | 10.05846 | 9.47E-06 | 0.000175 | up-regulated |
| hsa-miR-22-3p | 1.712757 | 14.40227 | 8.76E-05 | 0.000944 | up-regulated |
| hsa-miR-26a-5p | 1.713603 | 14.88296 | 6.24E-05 | 0.000713 | up-regulated |
| hsa-miR-320a | 1.716011 | 14.29503 | 4.60E-05 | 0.000558 | up-regulated |
| hsa-miR-584-5p | 1.725289 | 11.26381 | 9.12E-05 | 0.000972 | up-regulated |
| hsa-miR-3120-3p | 1.727502 | 6.509526 | 2.78E-05 | 0.000396 | up-regulated |
| hsa-miR-23a-3p | 1.73152 | 13.42801 | 6.43E-05 | 0.000727 | up-regulated |
| hsa-miR-224-5p | 1.734023 | 8.906963 | 0.001896 | 0.010588 | up-regulated |
| hsa-miR-21-3p | 1.734134 | 8.873067 | 5.34E-05 | 0.000629 | up-regulated |
| hsa-miR-126-3p | 1.743321 | 14.14183 | 4.75E-05 | 0.000573 | up-regulated |
| hsa-miR-151a-5p | 1.747141 | 12.85909 | 2.87E-05 | 0.000403 | up-regulated |
| hsa-miR-101-5p | 1.747331 | 12.39581 | 1.24E-05 | 0.000212 | up-regulated |
| hsa-miR-222-3p | 1.754326 | 10.25152 | 0.000129 | 0.00124 | up-regulated |
| hsa-miR-146b-5p | 1.758448 | 10.31477 | 3.46E-05 | 0.000456 | up-regulated |
| hsa-miR-93-5p | 1.760771 | 12.38422 | 9.70E-07 | 2.57E-05 | up-regulated |
| hsa-miR-339-5p | 1.765195 | 10.11328 | 0.000108 | 0.001088 | up-regulated |
| hsa-miR-1307-5p | 1.77827 | 8.781097 | 5.64E-05 | 0.000655 | up-regulated |
| hsa-miR-423-3p | 1.784347 | 11.35588 | 0.000119 | 0.001163 | up-regulated |
| hsa-miR-1908-5p | 1.794502 | 7.94517 | 0.000145 | 0.001369 | up-regulated |
| hsa-miR-206 | 1.796442 | 8.131443 | 1.44E-05 | 0.000241 | up-regulated |
| hsa-miR-1245a | 1.801451 | 6.807675 | 0.000688 | 0.00471 | up-regulated |
| hsa-miR-210-3p | 1.80291 | 7.881707 | 0.000107 | 0.001084 | up-regulated |
| hsa-miR-223-5p | 1.824316 | 8.504003 | 2.23E-05 | 0.00034 | up-regulated |
| hsa-miR-4433b-5p | 1.829441 | 9.434545 | 0.000273 | 0.002264 | up-regulated |
| hsa-miR-28-3p | 1.849426 | 10.14394 | 4.05E-05 | 0.000512 | up-regulated |
| hsa-miR-2392 | 1.856396 | 8.85409 | 1.36E-05 | 0.000229 | up-regulated |
| hsa-let-7e-5p | 1.88514 | 7.573826 | 5.97E-09 | 3.33E-07 | up-regulated |
| hsa-miR-223-3p | 1.887586 | 14.85575 | 9.48E-05 | 0.000994 | up-regulated |
| hsa-miR-497-5p | 1.889178 | 7.071544 | 1.09E-05 | 0.000191 | up-regulated |
| hsa-miR-3196 | 1.893976 | 3.747801 | 0.002384 | 0.012733 | up-regulated |
| hsa-miR-24-3p | 1.946248 | 13.31369 | 2.32E-05 | 0.000348 | up-regulated |
| hsa-miR-151a-3p | 1.953077 | 12.5285 | 4.45E-05 | 0.000545 | up-regulated |
| hsa-miR-326 | 1.9556 | 9.752668 | 4.08E-05 | 0.000512 | up-regulated |
| hsa-miR-140-5p | 1.980667 | 9.110046 | 9.93E-06 | 0.000181 | up-regulated |
| hsa-miR-1277-5p | 1.981322 | 7.455728 | 2.52E-07 | 8.40E-06 | up-regulated |
| hsa-miR-548a-3p | 1.988017 | 6.48135 | 0.00013 | 0.001242 | up-regulated |
| hsa-miR-625-3p | 2.003381 | 8.837781 | 2.68E-06 | 6.10E-05 | up-regulated |
| hsa-miR-28-5p | 2.005039 | 9.682466 | 1.12E-05 | 0.000195 | up-regulated |
| hsa-miR-425-3p | 2.026902 | 8.395379 | 1.80E-05 | 0.000289 | up-regulated |
| hsa-miR-200c-3p | 2.030677 | 6.629601 | 2.15E-07 | 7.36E-06 | up-regulated |
| hsa-miR-199a-3p | 2.034698 | 14.31547 | 5.96E-05 | 0.000689 | up-regulated |
| hsa-miR-221-3p | 2.036088 | 14.35089 | 9.44E-05 | 0.000993 | up-regulated |
| hsa-miR-744-5p | 2.060012 | 9.943245 | 9.77E-06 | 0.000179 | up-regulated |
| hsa-miR-20a-5p | 2.067271 | 12.37431 | 2.63E-07 | 8.65E-06 | up-regulated |
| hsa-miR-199a-5p | 2.076777 | 12.84471 | 5.55E-05 | 0.000648 | up-regulated |
| hsa-miR-548h-3p | 2.077767 | 6.314756 | 3.68E-07 | 1.15E-05 | up-regulated |
| hsa-miR-17-5p | 2.09795 | 12.49579 | 4.61E-07 | 1.38E-05 | up-regulated |
| hsa-miR-1307-3p | 2.125317 | 9.360631 | 6.34E-06 | 0.000125 | up-regulated |
| hsa-miR-142-3p | 2.158934 | 10.36437 | 3.51E-06 | 7.64E-05 | up-regulated |
| hsa-miR-200b-3p | 2.160592 | 7.52107 | 2.68E-06 | 6.10E-05 | up-regulated |
| hsa-miR-1260b | 2.165161 | 8.553192 | 4.24E-08 | 1.70E-06 | up-regulated |
| hsa-miR-4433b-3p | 2.187622 | 5.431661 | 1.39E-06 | 3.44E-05 | up-regulated |
| hsa-miR-21-5p | 2.28601 | 16.70712 | 3.32E-06 | 7.34E-05 | up-regulated |
| hsa-miR-613 | 2.376165 | 6.829777 | 4.27E-06 | 9.06E-05 | up-regulated |
| hsa-miR-1290 | 2.387911 | 8.05425 | 2.34E-05 | 0.000349 | up-regulated |
| hsa-miR-6872-3p | 2.400088 | 5.959034 | 0.00011 | 0.001098 | up-regulated |
| hsa-miR-1277-3p | 2.439428 | 7.335232 | 6.10E-06 | 0.000122 | up-regulated |
| hsa-miR-6872-5p | 2.552457 | 5.953501 | 6.00E-05 | 0.000692 | up-regulated |
| hsa-miR-375 | 2.884273 | 8.641586 | 5.22E-07 | 1.54E-05 | up-regulated |
| hsa-miR-1246 | 3.015335 | 8.35906 | 1.23E-06 | 3.14E-05 | up-regulated |

**Table 4: List of differential miRNAs of GSE26964:**

| Id | logFC | AveExpr | P.Value | adj.P.Val |
| --- | --- | --- | --- | --- |
| hsa-miR-143 | -4.362038101 | 11.18973253 | 0.005247824 | 0.134106758 |
| hsa-miR-145 | -4.295679138 | 10.3109426 | 0.001988998 | 0.134106758 |
| hsa-miR-205 | -3.939425019 | 6.331088039 | 0.001018747 | 0.117951279 |
| obs_78 | -3.503569878 | 6.631019759 | 0.008957925 | 0.134106758 |
| obs_36 | -3.422179331 | 7.505144119 | 0.007479587 | 0.134106758 |
| hsa-miR-125b | -3.350071684 | 10.8603227 | 0.023862308 | 0.134106758 |
| hsa-miR-29a | -3.218910318 | 10.06540511 | 0.039312124 | 0.149251825 |
| hsa-miR-27b | -3.043062198 | 10.50874212 | 0.031859408 | 0.13461307 |
| hsa-miR-99a | -2.997567488 | 9.650525473 | 0.046320457 | 0.164283221 |
| hsa-miR-100 | -2.956438606 | 8.659693621 | 0.017789948 | 0.134106758 |
| hsa-miR-221 | -2.915646685 | 6.455968073 | 0.012989938 | 0.134106758 |
| hsa-miR-19a | -2.852531709 | 9.499740398 | 0.047168919 | 0.165936834 |
| hsa-miR-33a | -2.818812385 | 7.744120118 | 0.006690651 | 0.134106758 |
| PREDICTED_MIR152 | -2.80859509 | 7.681165889 | 0.007461015 | 0.134106758 |
| hsa-let-7a | -2.795424316 | 10.6743388 | 0.048782943 | 0.167977514 |
| hsa-miR-153 | -2.610143908 | 8.467889275 | 0.018873242 | 0.134106758 |
| hsa-miR-193a-3p | -2.564022515 | 7.56050504 | 0.011622355 | 0.134106758 |
| PREDICTED_MIR222 | -2.504998382 | 6.108039376 | 0.001832665 | 0.134106758 |
| hsa-miR-363 | -2.370358945 | 6.993633085 | 0.046670437 | 0.164974567 |
| hsa-miR-190 | -2.369170232 | 7.884077418 | 0.040620942 | 0.151121866 |
| hsa-miR-130a | -2.269068405 | 7.746086956 | 0.016020682 | 0.134106758 |
| hsa-miR-30e | -2.244965099 | 8.371026485 | 0.040647411 | 0.151121866 |
| hsa-miR-508-5p | -2.228359287 | 14.33855512 | 0.000351069 | 0.093384289 |
| PREDICTED_MIR200 | -2.20085753 | 5.987848554 | 0.011984394 | 0.134106758 |
| PREDICTED_MIR254 | -2.180770142 | 8.375648827 | 0.015675451 | 0.134106758 |
| hsa-miR-184 | -2.133773265 | 6.433641174 | 0.041392526 | 0.152922387 |
| Zip5 | -2.113376286 | 14.20692966 | 0.016775744 | 0.134106758 |
| PREDICTED_MIR165 | -2.101860486 | 12.4302032 | 4.10E-07 | 0.000436715 |
| rno-miR-17-3p | -2.085181529 | 6.468793907 | 0.022504112 | 0.134106758 |
| hsa-miR-323-3p | -2.064401871 | 5.204055378 | 0.007057268 | 0.134106758 |
| hsa-miR-346 | -2.040649411 | 5.845695452 | 0.00429595 | 0.134106758 |
| mmu-miR-881 | -2.030671385 | 5.910439284 | 0.009579147 | 0.134106758 |
| hsa-miR-330-3p | -2.024097383 | 5.512329523 | 0.003989854 | 0.134106758 |
| mmu-miR-105 | -1.994255319 | 6.843696725 | 0.015402581 | 0.134106758 |
| PREDICTED_MIR234 | -1.91058541 | 5.394700528 | 0.001076085 | 0.117951279 |
| hsa-let-7b | -1.889553194 | 10.16476549 | 0.047811841 | 0.166382428 |
| hsa-miR-922 | -1.874737335 | 7.178556495 | 0.045269096 | 0.162028322 |
| mmu-miR-34b-5p | -1.820325352 | 6.003265323 | 0.031741967 | 0.13461307 |
| hsa-miR-134 | -1.818829365 | 5.685947515 | 0.002272159 | 0.134106758 |
| hsa-miR-410 | -1.76783892 | 5.328817533 | 0.008409802 | 0.134106758 |
| PREDICTED_MIR146 | -1.760302482 | 5.696732957 | 0.006105072 | 0.134106758 |
| hsa-miR-615-3p | -1.717042296 | 10.9891792 | 0.007931304 | 0.134106758 |
| obs_86 | -1.6953602 | 5.295365815 | 0.010283874 | 0.134106758 |
| PREDICTED_MIR158 | -1.676039843 | 5.286448727 | 0.023665193 | 0.134106758 |
| PREDICTED_MIR207 | -1.670589108 | 12.49057823 | 0.002307455 | 0.134106758 |
| hsa-miR-339-5p | -1.658178742 | 5.278205143 | 0.000729955 | 0.116082465 |
| Zip15 | -1.534630703 | 14.13305031 | 0.043540233 | 0.157574176 |
| obs_89 | -1.484314768 | 5.197960232 | 0.016539014 | 0.134106758 |
| hsa-miR-801 | -1.463798922 | 11.58044541 | 0.00281089 | 0.134106758 |
| rno-miR-881 | -1.392783174 | 5.155714881 | 0.00290314 | 0.134106758 |
| mmu-miR-801 | -1.392320891 | 11.16725551 | 0.001801692 | 0.134106758 |
| PREDICTED_MIR173 | -1.366500463 | 5.143584398 | 0.015048738 | 0.134106758 |
| PREDICTED_MIR249 | -1.364411338 | 5.871978949 | 0.04244332 | 0.155187948 |
| hsa-miR-516b | -1.358526177 | 5.139903959 | 0.01662499 | 0.134106758 |
| hsa-miR-524-5p | -1.334895746 | 5.128997606 | 0.019626761 | 0.134106758 |
| hsa-miR-631 | -1.322092093 | 8.757819191 | 0.006340817 | 0.134106758 |
| mmu-miR-217 | -1.266793135 | 5.505459126 | 0.019836889 | 0.134106758 |
| PREDICTED_MIR131 | -1.264469931 | 4.927441792 | 0.005633057 | 0.134106758 |
| hsa-miR-219-5p | -1.201692709 | 4.858819979 | 0.045380113 | 0.162028322 |
| PREDICTED_MIR250 | -1.19942398 | 5.066472176 | 0.009226063 | 0.134106758 |
| hsa-miR-362-5p | -1.179167871 | 5.057123202 | 0.02020064 | 0.134106758 |
| mmu-miR-351 | -1.172038496 | 14.13298177 | 0.004065051 | 0.134106758 |
| obs_56 | -1.066804131 | 5.005263015 | 0.007259587 | 0.134106758 |
| mmu-miR-676 | 1.001961334 | 4.43690576 | 0.04800696 | 0.166382428 |
| hsa-miR-613 | 1.047877563 | 9.887655337 | 0.019534539 | 0.134106758 |
| hsa-miR-564 | 1.058687199 | 11.51889778 | 0.018324318 | 0.134106758 |
| hsa-miR-125a-3p | 1.060661639 | 13.26763518 | 0.038166926 | 0.148210253 |
| mmu-miR-465c-5p | 1.078305015 | 4.44697862 | 0.049209383 | 0.168356218 |
| hsa-miR-639 | 1.088700739 | 10.05369765 | 0.014710234 | 0.134106758 |
| hsa-miR-557 | 1.144072206 | 14.31283279 | 0.015612587 | 0.134106758 |
| hsa-miR-139-3p | 1.150218925 | 9.791226437 | 0.03390116 | 0.138733976 |
| hsa-miR-532-3p | 1.184887908 | 10.73923008 | 0.011979898 | 0.134106758 |
| mmu-miR-689 | 1.262517709 | 11.24480892 | 0.037073035 | 0.145020988 |
| hsa-miR-767-3p | 1.285726213 | 8.076075037 | 0.042994548 | 0.156130372 |
| obs_07 | 1.365917826 | 10.7674996 | 0.013018526 | 0.134106758 |
| hsa-miR-498 | 1.386629122 | 9.810950893 | 0.028944192 | 0.134106758 |
| Blank | 1.391388419 | 6.838590835 | 0.024022744 | 0.134106758 |
| obs_15 | 1.503930703 | 9.950193183 | 0.018578123 | 0.134106758 |
| rno-miR-290 | 1.549790032 | 10.89548699 | 0.003149583 | 0.134106758 |
| hsa-miR-770-5p | 1.56996108 | 7.650950886 | 0.026912147 | 0.134106758 |
| hsa-miR-572 | 1.570526431 | 12.6442222 | 0.003704647 | 0.134106758 |
| mmu-miR-503 | 1.590894079 | 7.777135638 | 0.03170935 | 0.13461307 |
| hsa-miR-512-5p | 1.62699985 | 6.932593808 | 0.03635195 | 0.143786151 |
| mmu-miR-699 | 1.631652592 | 8.191325112 | 0.026633079 | 0.134106758 |
| hsa-miR-654-5p | 1.699019321 | 10.15982043 | 0.014204529 | 0.134106758 |
| hsa-miR-575 | 1.73729993 | 10.74526424 | 0.005737992 | 0.134106758 |
| hsa-miR-637 | 1.754391054 | 10.29705402 | 0.008711991 | 0.134106758 |
| PREDICTED_MIR112 | 1.766151921 | 12.33088868 | 0.017537195 | 0.134106758 |
| mmu-miR-327 | 1.775778078 | 8.544615882 | 0.016300605 | 0.134106758 |
| rno-miR-333 | 1.776655125 | 8.957849591 | 0.001473711 | 0.134106758 |
| obs_82 | 1.825036339 | 8.591550582 | 0.040621942 | 0.151121866 |
| hsa-miR-668 | 1.884368116 | 9.47445518 | 0.002189928 | 0.134106758 |
| mmu-miR-770-3p | 1.891976729 | 11.73079949 | 0.002273201 | 0.134106758 |
| obs_87 | 1.900688279 | 8.348621885 | 0.019817332 | 0.134106758 |
| hsa-miR-622 | 2.007967981 | 8.748350584 | 0.03915522 | 0.149251825 |
| hsa-miR-371-5p | 2.135034779 | 12.44759677 | 0.003281216 | 0.134106758 |
| mmu-miR-290-5p | 2.217303183 | 10.78135574 | 0.0007637 | 0.116082465 |
| hsa-miR-623 | 2.234245414 | 5.500416057 | 0.027638146 | 0.134106758 |
| obs_51 | 2.318227051 | 11.71418649 | 0.000651273 | 0.116082465 |
| mmu-miR-501-3p | 2.327785999 | 5.957212332 | 0.039232461 | 0.149251825 |
| hsa-miR-127-5p | 2.350725764 | 7.896217096 | 0.001108565 | 0.117951279 |
| mmu-miR-341 | 2.786495546 | 5.397808797 | 0.026149382 | 0.134106758 |
| hsa-miR-144 | 3.11822895 | 5.951566151 | 0.019346738 | 0.134106758 |
| hsa-miR-516a-5p | 3.331346943 | 9.510615695 | 0.007618718 | 0.134106758 |
| rno-miR-325-5p | 3.38345174 | 7.256032578 | 0.000109975 | 0.039004381 |
| mmu-miR-125b-3p | 3.464832946 | 10.44098492 | 2.67E-05 | 0.014188702 |
| hsa-miR-210 | 3.509184169 | 8.56956088 | 0.003675477 | 0.134106758 |

**Table 5: List of Hub genes screened by cytoscape:**

| node_name | MCC | Degree | EcCentricity | Radiality |
| --- | --- | --- | --- | --- |
| KRAS | 44 | 13 | 0.22368 | 6.35263 |
| RHOA | 43 | 11 | 0.17895 | 5.99474 |
| BDNF | 40 | 9 | 0.17895 | 5.99474 |
| HNRNPA1 | 11 | 7 | 0.17895 | 5.88737 |
| BRCA1 | 9 | 7 | 0.17895 | 5.90526 |
| FYN | 33 | 7 | 0.17895 | 5.85158 |
| BCL2L11 | 9 | 7 | 0.17895 | 5.95895 |
| NRG1 | 32 | 6 | 0.17895 | 5.90526 |
| SETX | 6 | 5 | 0.14912 | 5.26105 |
| FXR1 | 6 | 5 | 0.17895 | 5.85158 |
| BACE1 | 8 | 5 | 0.14912 | 5.44 |
| CDC37 | 5 | 4 | 0.17895 | 5.67263 |
| TIMP3 | 5 | 4 | 0.17895 | 5.74421 |
| PDCD4 | 5 | 4 | 0.17895 | 5.67263 |
| SGK1 | 3 | 3 | 0.17895 | 5.70842 |
| NUP50 | 3 | 3 | 0.12782 | 4.47368 |
| MATR3 | 4 | 3 | 0.14912 | 5.11789 |
| DPYSL2 | 6 | 3 | 0.14912 | 5.31474 |
| NOVA1 | 3 | 3 | 0.14912 | 5.35053 |
| E2F1 | 3 | 3 | 0.14912 | 5.44 |
| MTAP | 2 | 2 | 0.14912 | 4.83158 |
| GIT1 | 2 | 2 | 0.14912 | 5.17158 |
| NUFIP2 | 2 | 2 | 0.14912 | 5.08211 |
| PPIB | 2 | 2 | 0.12782 | 4.02632 |
| HSP90B1 | 2 | 2 | 0.14912 | 4.86737 |
| MAP3K2 | 2 | 2 | 0.17895 | 5.54737 |
| CAPZA1 | 2 | 2 | 0.14912 | 5.01053 |
| KPNA1 | 2 | 2 | 0.14912 | 5.13579 |
| GLUL | 2 | 2 | 0.14912 | 5.15368 |
| PAG1 | 2 | 2 | 0.14912 | 5.08211 |
